# Supplementary material
Source: PubMed Central journal article supplement (PMC5562044)
Supplement: NIHMS889879-supplement-Supporting_Info.pdf [file NIHMS889879-supplement-Supporting_Info.pdf]

# Supporting Information

Supporting Table S1: Reconstruction dimension and model order

| Experiment                       | $P$                      | $Q$ | $R$ | $L$ | $M$ | $N$ |
|----------------------------------|--------------------------|-----|-----|-----|-----|-----|
| Phantom                          | $50 \times 50 \times 20$ | 192 | 1   | 5   | 5   | 1   |
| Human: Static                    | $32 \times 32 \times 12$ | 192 | 1   | 5   | 5   | 1   |
| Human: Dynamic (before exercise) | $32 \times 32 \times 12$ | 192 | 12  | 10  | 5   | 2   |
| Human: Dynamic (after exercise)  | $32 \times 32 \times 12$ | 192 | 12  | 15  | 5   | 4   |
| Animal: Dynamic                  | $32 \times 32 \times 12$ | 256 | 30  | 6   | 5   | 4   |

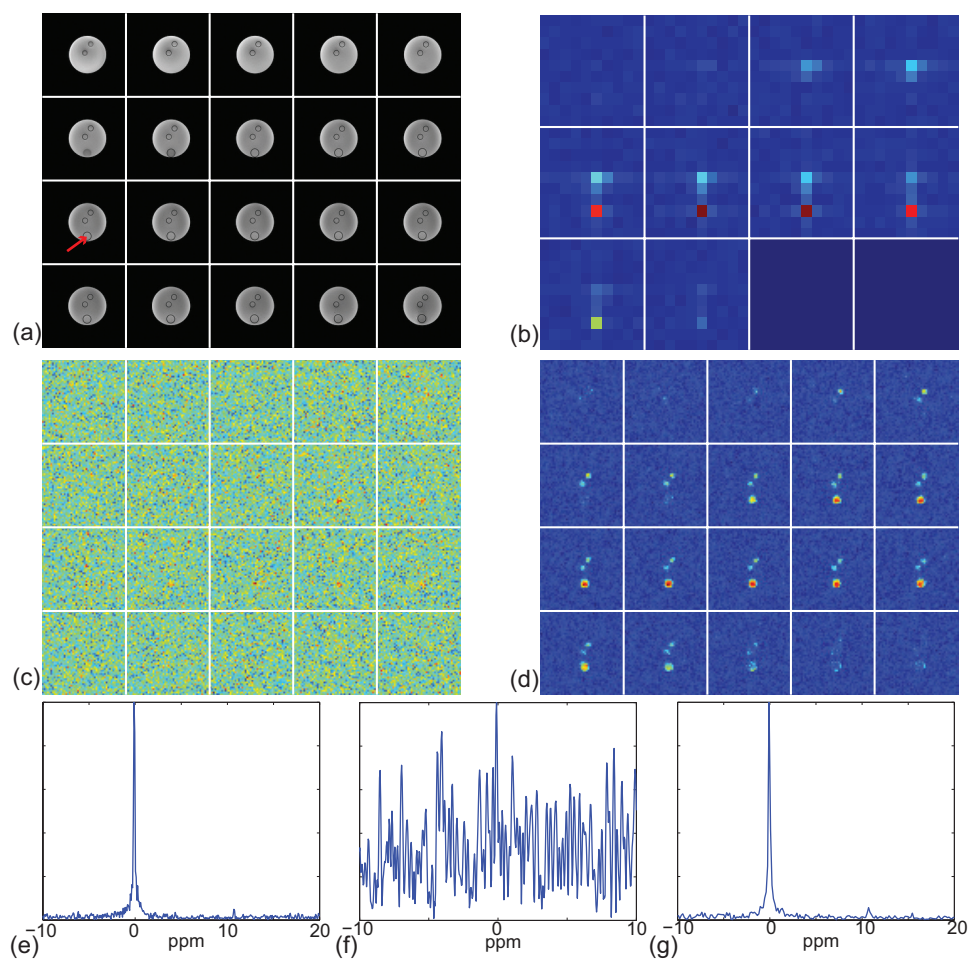

Supporting Figure S1: Static  $^{31}\text{P}$ -MRSI on a phantom. (a)  $^1\text{H}$  structural images. (b) to (d) Maps of Pi obtained by the conventional CSI ( $10 \times 10 \times 10$  spatial encodings and 6 averages), EPSI ( $50 \times 50 \times 20$  spatial encodings and 6 averages), and the proposed method ( $50 \times 50 \times 20$  spatial encodings), respectively, in an equivalent-time acquisition experiment. (e) to (g) Representative spectra from (b) to (d). The location of the spectrum is indicated by the red arrow in (a).

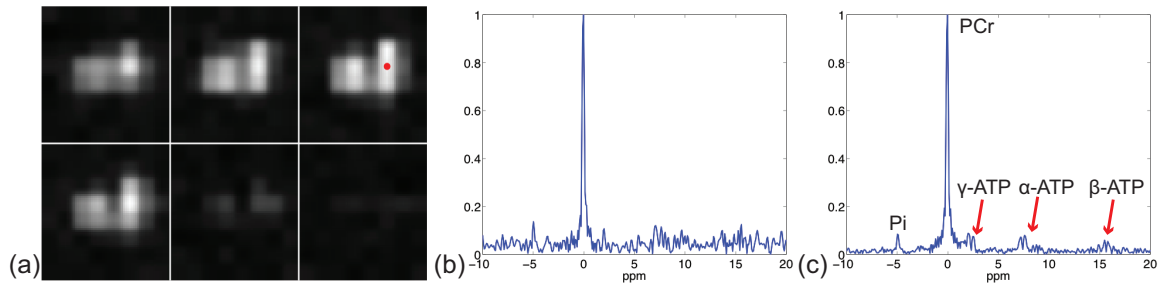

Supporting Figure S2: Static  $^{31}\text{P}$ -MRSI of the calf muscle by a low-resolution CSI acquisition ( $10 \times 10 \times 6$  spatial encodings). (a) Map of PCr. (b) and (c) Representative spectra before and after LORA (Nguyen et al., IEEE Trans Biomed Eng, 2013;60:78-89) denoising.

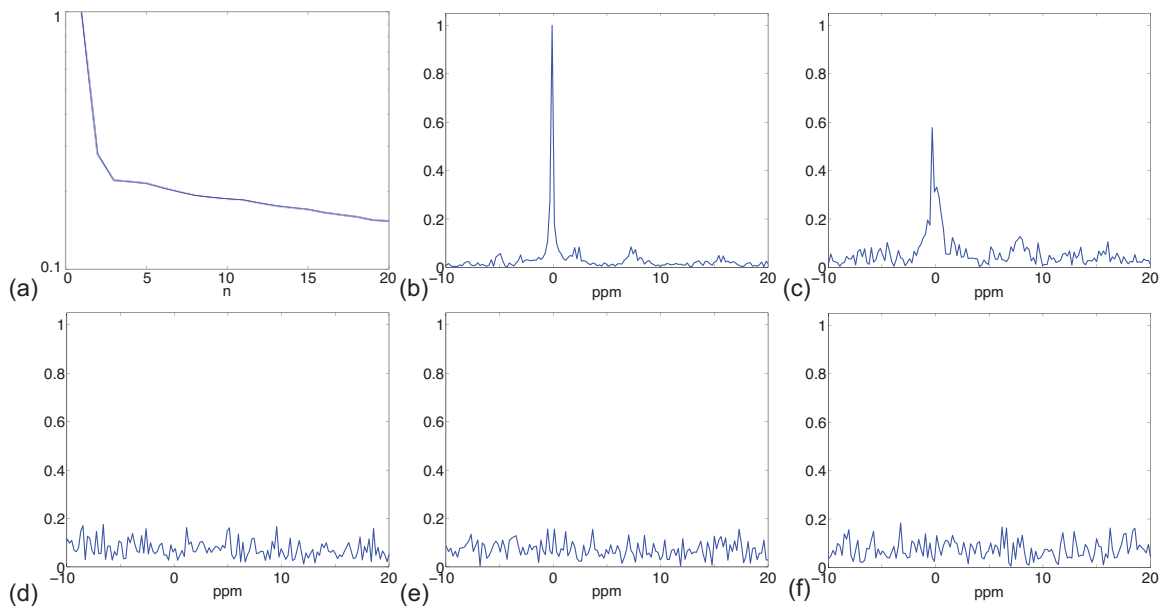

Supporting Figure S3: Singular value distribution (a) and the corresponding spectral basis functions that were used to generate Fig.3.
